# Supplementary material
Source: publisher site journal article supplement (https://www.dovepress.com/get_supplementary_file.php?f=256022.docx)
Supplement: Supplementary file 1 [file get_supplementary_file.php]

**Supplementary Figure 1. Primary screening of FASN siRNA by cell cytotoxicity assay**

**Notes:** Proliferation of SK-BR3 cells in different concentration of FASN-siRNA containing liposomal formulations. SK-BR3 cells were grown in 96 well plates treated at different concentration (0-200 nM) of siRNA with various formulations of liposomes for 48 h and the percentage of cell viability was measured by cell cytotoxicity assay. The sham liposomes contained the scrambled siRNA instead of FASN. Data represent mean percentages of viable cells ± SD of three independent experiments.

**

**
